# Supplementary material
Source: PubMed Central journal article supplement (PMC2801898)
Supplement: NIHMS131310-supplement-1.pdf [file NIHMS131310-supplement-1.pdf]

**Supplementary Material for manuscript CIRCULATIONAHA/2008/834986**

Genome-wide Association Scan Identifies Variants near *Matrix Metalloproteinase (MMP)* Genes on Chromosome 11q21-22 Strongly Associated with Serum MMP-1 Levels

Yu-Ching Cheng et al.

**Supplementary Figure Legends**

**Figure S1.** Linkage disequilibrium structure of the 179 genome-wide significant SNPs on chromosome 11q: 95,569,593-107,024,176bp region. (above:  $|D'|$ ; bottom:  $r^2$ )

**Figure S2.** Results of SNP association with MMP-1 levels on chromosome 11q: 95,569,593-107,024,176 bp region in the forward regression model building. *P*-values of SNPs after including (A) rs495366, (B) rs495366 and rs12289128, and (C) rs495366, rs12289128 and rs11226373, in the model.

**Table S1.** Information of the 179 SNPs significantly associated with MMP-1 levels, ordered by physical position on chromosome 11

| RS ID      | Chr | Position | Cytoband | Minor/<br>major<br>allele | MAF   | HWE<br><i>P</i> | Call<br>Rate<br>(%) | Effect<br>Size* | Proportion.<br>of<br>Variation | <i>P</i> <sup>†</sup> | GC <i>P</i> <sup>‡</sup> |
|------------|-----|----------|----------|---------------------------|-------|-----------------|---------------------|-----------------|--------------------------------|-----------------------|--------------------------|
| rs523519   | 11  | 95569593 | q21      | A/C                       | 0.391 | 0.815           | 99.9                | 0.23            | 0.062                          | 3.93E-10              | 4.57E-07                 |
| rs10501846 | 11  | 95592312 | q21      | G/T                       | 0.266 | 0.344           | 99.5                | -0.21           | 0.044                          | 5.28E-08              | 1.10E-05                 |
| rs12417347 | 11  | 95596852 | q21      | G/A                       | 0.267 | 0.309           | 99.9                | -0.21           | 0.043                          | 8.88E-08              | 1.55E-05                 |
| rs11212360 | 11  | 95972541 | q21      | T/C                       | 0.216 | 0.988           | 98.6                | 0.26            | 0.036                          | 4.07E-09              | 1.95E-06                 |
| rs4320978  | 11  | 95977664 | q21      | G/A                       | 0.218 | 0.672           | 95.1                | 0.26            | 0.037                          | 3.27E-09              | 1.68E-06                 |
| rs3019723  | 11  | 96086712 | q21      | C/T                       | 0.195 | 0.916           | 99.9                | -0.26           | 0.063                          | 3.04E-09              | 1.93E-06                 |
| rs3019692  | 11  | 96106466 | q21      | A/C                       | 0.195 | 0.895           | 99.7                | -0.26           | 0.063                          | 3.33E-09              | 2.06E-06                 |
| rs1439528  | 11  | 96115783 | q21      | A/G                       | 0.357 | 0.157           | 95.9                | -0.22           | 0.058                          | 5.82E-09              | 2.79E-06                 |
| rs11226865 | 11  | 96888090 | q22.1    | A/G                       | 0.155 | 0.197           | 99.7                | 0.31            | 0.039                          | 4.64E-10              | 4.67E-07                 |
| rs1815913  | 11  | 97357708 | q22.1    | C/T                       | 0.471 | 0.271           | 100.0               | 0.20            | 0.044                          | 6.14E-09              | 2.56E-06                 |
| rs11213924 | 11  | 97450907 | q22.1    | A/G                       | 0.175 | 0.084           | 99.5                | -0.33           | 0.070                          | 1.71E-12              | 1.19E-08                 |
| rs3018249  | 11  | 97540643 | q22.1    | T/G                       | 0.255 | 0.098           | 100.0               | -0.27           | 0.057                          | 2.61E-11              | 6.88E-08                 |
| rs7939072  | 11  | 97635266 | q22.1    | T/C                       | 0.177 | 0.101           | 100.0               | -0.33           | 0.073                          | 6.31E-13              | 6.19E-09                 |
| rs2155912  | 11  | 97684699 | q22.1    | A/G                       | 0.298 | 0.756           | 100.0               | -0.20           | 0.035                          | 9.34E-08              | 1.55E-05                 |
| rs10790140 | 11  | 97937406 | q22.1    | G/A                       | 0.429 | 0.988           | 99.7                | 0.20            | 0.039                          | 7.35E-08              | 1.33E-05                 |
| rs4342998  | 11  | 97953696 | q22.1    | A/C                       | 0.377 | 0.121           | 97.7                | 0.22            | 0.042                          | 1.89E-08              | 5.43E-06                 |
| rs11217332 | 11  | 98261448 | q22.1    | T/C                       | 0.299 | 0.488           | 99.4                | 0.21            | 0.036                          | 8.09E-08              | 1.41E-05                 |
| rs1601690  | 11  | 98266953 | q22.1    | C/T                       | 0.260 | 0.035           | 96.9                | 0.22            | 0.038                          | 8.84E-08              | 0.000015                 |
| rs11217456 | 11  | 98277793 | q22.1    | T/C                       | 0.257 | 0.110           | 100.0               | 0.23            | 0.042                          | 2.80E-08              | 7.05E-06                 |
| rs7944622  | 11  | 98279344 | q22.1    | A/G                       | 0.257 | 0.092           | 98.7                | 0.22            | 0.040                          | 6.59E-08              | 1.25E-05                 |
| rs7947532  | 11  | 98279373 | q22.1    | C/G                       | 0.257 | 0.110           | 100.0               | 0.23            | 0.042                          | 2.80E-08              | 7.05E-06                 |
| rs11607090 | 11  | 98620980 | q22.1    | A/T                       | 0.233 | 0.513           | 99.2                | -0.22           | 0.056                          | 8.09E-08              | 1.71E-05                 |

**Table S1** (continued)

| RS ID      | Chr | Position  | Cytoband | Minor/<br>major<br>allele | MAF   | HWE<br><i>P</i> | Call<br>Rate<br>(%) | Effect<br>Size* | Proportion.<br>of<br>Variation | <i>P</i> <sup>†</sup> | GC <i>P</i> <sup>‡</sup> |
|------------|-----|-----------|----------|---------------------------|-------|-----------------|---------------------|-----------------|--------------------------------|-----------------------|--------------------------|
| rs2466912  | 11  | 98892027  | q22.1    | A/G                       | 0.477 | 0.896           | 98.2                | -0.26           | 0.067                          | 1.06E-12              | 8.37E-09                 |
| rs10750313 | 11  | 98903530  | q22.1    | C/T                       | 0.224 | 0.215           | 100.0               | 0.24            | 0.042                          | 1.64E-08              | 4.92E-06                 |
| rs11220658 | 11  | 98994224  | q22.1    | A/G                       | 0.240 | 0.394           | 99.6                | 0.25            | 0.047                          | 2.37E-09              | 1.36E-06                 |
| rs666825   | 11  | 99079899  | q22.1    | C/T                       | 0.424 | 0.478           | 99.4                | -0.28           | 0.082                          | 2.40E-15              | 1.51E-10                 |
| rs605521   | 11  | 99092323  | q22.1    | A/G                       | 0.492 | 0.374           | 99.9                | 0.21            | 0.036                          | 6.60E-09              | 2.68E-06                 |
| rs17094347 | 11  | 99472494  | q22.1    | T/C                       | 0.188 | 0.561           | 99.6                | -0.26           | 0.047                          | 3.28E-08              | 8.09E-06                 |
| rs1301784  | 11  | 99748688  | q22.1    | G/A                       | 0.460 | 0.289           | 98.2                | 0.21            | 0.032                          | 1.87E-09              | 1.20E-06                 |
| rs1301783  | 11  | 99750118  | q22.1    | G/A                       | 0.496 | 0.084           | 99.2                | 0.22            | 0.034                          | 6.58E-11              | 1.38E-07                 |
| rs7930146  | 11  | 99835818  | q22.1    | C/T                       | 0.223 | 0.187           | 98.8                | -0.29           | 0.035                          | 2.39E-11              | 7.13E-08                 |
| rs12289202 | 11  | 99891485  | q22.1    | C/T                       | 0.281 | 0.009           | 99.9                | -0.23           | 0.017                          | 5.25E-09              | 2.75E-06                 |
| rs7125960  | 11  | 99973945  | q22.1    | C/T                       | 0.422 | 0.510           | 98.6                | -0.19           | 0.040                          | 6.09E-08              | 1.18E-05                 |
| rs17710616 | 11  | 100001885 | q22.1    | T/C                       | 0.128 | 0.674           | 99.4                | -0.37           | 0.073                          | 5.29E-12              | 2.70E-08                 |
| rs7946913  | 11  | 100108524 | q22.1    | A/G                       | 0.488 | 0.931           | 99.5                | -0.22           | 0.040                          | 9.66E-10              | 7.50E-07                 |
| rs7947761  | 11  | 100129809 | q22.1    | G/A                       | 0.409 | 0.186           | 98.2                | -0.21           | 0.043                          | 2.65E-08              | 6.81E-06                 |
| rs17095426 | 11  | 100143813 | q22.1    | A/G                       | 0.425 | 0.568           | 99.0                | -0.21           | 0.047                          | 1.03E-08              | 3.68E-06                 |
| rs17095429 | 11  | 100144512 | q22.1    | A/C                       | 0.421 | 0.674           | 100.0               | -0.21           | 0.050                          | 5.04E-09              | 2.31E-06                 |
| rs626596   | 11  | 100282500 | q22.1    | A/G                       | 0.478 | 0.458           | 98.6                | -0.20           | 0.049                          | 1.37E-08              | 4.57E-06                 |
| rs10791432 | 11  | 100307731 | q22.1    | T/C                       | 0.388 | 0.353           | 100.0               | -0.23           | 0.067                          | 1.29E-10              | 2.28E-07                 |
| rs543146   | 11  | 100319780 | q22.1    | G/A                       | 0.299 | 0.110           | 99.5                | 0.23            | 0.058                          | 3.91E-09              | 2.13E-06                 |
| rs7939782  | 11  | 100327525 | q22.1    | C/T                       | 0.481 | 0.447           | 99.7                | -0.21           | 0.053                          | 7.41E-09              | 3.10E-06                 |
| rs10895033 | 11  | 100329024 | q22.1    | C/T                       | 0.388 | 0.353           | 100.0               | -0.23           | 0.067                          | 1.29E-10              | 2.28E-07                 |
| rs1944432  | 11  | 100334730 | q22.1    | T/C                       | 0.415 | 0.839           | 99.6                | 0.30            | 0.101                          | 4.87E-17              | 1.32E-11                 |

**Table S1** (continued)

| RS ID      | Chr | Position  | Cytoband | Minor/<br>major<br>allele | MAF   | HWE<br><i>P</i> | Call<br>Rate<br>(%) | Effect<br>Size* | Proportion.<br>of<br>Variation | <i>P</i> <sup>†</sup> | GC <i>P</i> <sup>‡</sup> |
|------------|-----|-----------|----------|---------------------------|-------|-----------------|---------------------|-----------------|--------------------------------|-----------------------|--------------------------|
| rs10895036 | 11  | 100342796 | q22.1    | C/T                       | 0.387 | 0.316           | 99.7                | -0.23           | 0.068                          | 1.18E-10              | 2.14E-07                 |
| rs1893069  | 11  | 100352553 | q22.1    | A/T                       | 0.379 | 0.110           | 96.3                | -0.22           | 0.064                          | 5.33E-10              | 5.80E-07                 |
| rs523332   | 11  | 100379529 | q22.1    | G/T                       | 0.359 | 0.224           | 99.9                | -0.23           | 0.073                          | 1.25E-10              | 2.51E-07                 |
| rs1145465  | 11  | 100488204 | q22.1    | C/A                       | 0.262 | 0.708           | 99.5                | -0.22           | 0.060                          | 1.65E-08              | 6.07E-06                 |
| rs565186   | 11  | 100488839 | q22.1    | C/T                       | 0.260 | 0.510           | 99.5                | -0.22           | 0.061                          | 2.44E-08              | 8.17E-06                 |
| rs562894   | 11  | 100496895 | q22.1    | C/T                       | 0.260 | 0.479           | 99.5                | -0.21           | 0.057                          | 7.36E-08              | 1.65E-05                 |
| rs538343   | 11  | 100561549 | q22.1    | A/G                       | 0.260 | 0.541           | 100.0               | -0.22           | 0.059                          | 3.09E-08              | 9.32E-06                 |
| rs11224733 | 11  | 100740407 | q22.1    | A/T                       | 0.172 | 0.993           | 99.7                | -0.28           | 0.053                          | 3.50E-09              | 1.86E-06                 |
| rs1938988  | 11  | 100767635 | q22.1    | C/G                       | 0.177 | 0.526           | 96.0                | -0.28           | 0.055                          | 4.85E-09              | 2.36E-06                 |
| rs1938859  | 11  | 101052933 | q22.1    | C/T                       | 0.176 | 0.843           | 98.5                | 0.30            | 0.053                          | 8.75E-11              | 1.52E-07                 |
| rs17744964 | 11  | 101093883 | q22.1    | A/G                       | 0.343 | 0.392           | 97.3                | 0.21            | 0.047                          | 6.09E-08              | 1.25E-05                 |
| rs4754019  | 11  | 101096133 | q22.1    | A/G                       | 0.464 | 0.345           | 97.4                | 0.26            | 0.082                          | 2.95E-13              | 4.14E-09                 |
| rs1939052  | 11  | 101131785 | q22.1    | C/T                       | 0.404 | 0.127           | 100.0               | 0.27            | 0.094                          | 1.14E-14              | 5.38E-10                 |
| rs10895193 | 11  | 101137143 | q22.1    | A/G                       | 0.174 | 0.812           | 96.9                | 0.31            | 0.074                          | 6.36E-11              | 1.55E-07                 |
| rs10501990 | 11  | 101172368 | q22.1    | C/T                       | 0.465 | 0.181           | 99.9                | 0.19            | 0.056                          | 6.42E-08              | 1.46E-05                 |
| rs4754800  | 11  | 101172540 | q22.1    | G/A                       | 0.460 | 0.122           | 100.0               | 0.19            | 0.057                          | 4.45E-08              | 1.16E-05                 |
| rs10791523 | 11  | 101174030 | q22.1    | G/A                       | 0.465 | 0.193           | 100.0               | 0.19            | 0.056                          | 6.15E-08              | 1.42E-05                 |
| rs10791524 | 11  | 101174095 | q22.1    | T/C                       | 0.465 | 0.204           | 99.9                | 0.19            | 0.056                          | 6.25E-08              | 1.43E-05                 |
| rs7101850  | 11  | 101176555 | q22.1    | T/C                       | 0.463 | 0.222           | 99.7                | 0.19            | 0.056                          | 6.38E-08              | 1.45E-05                 |
| rs10791539 | 11  | 101247149 | q22.1    | A/G                       | 0.451 | 0.762           | 100.0               | 0.20            | 0.064                          | 9.52E-09              | 4.42E-06                 |
| rs7930416  | 11  | 101432254 | q22.1    | A/G                       | 0.307 | 0.635           | 99.5                | 0.23            | 0.065                          | 1.52E-09              | 1.24E-06                 |
| rs10791555 | 11  | 101433435 | q22.1    | C/T                       | 0.308 | 0.742           | 100.0               | 0.22            | 0.065                          | 2.43E-09              | 1.71E-06                 |

**Table S1** (continued)

| RS ID      | Chr | Position  | Cytoband | Minor/<br>major<br>allele | MAF   | HWE<br><i>P</i> | Call<br>Rate<br>(%) | Effect<br>Size* | Proportion.<br>of<br>Variation | <i>P</i> <sup>†</sup> | GC <i>P</i> <sup>‡</sup> |
|------------|-----|-----------|----------|---------------------------|-------|-----------------|---------------------|-----------------|--------------------------------|-----------------------|--------------------------|
| rs10895257 | 11  | 101491854 | q22.1    | A/G                       | 0.203 | 0.847           | 99.9                | 0.31            | 0.059                          | 1.19E-12              | 8.80E-09                 |
| rs11602707 | 11  | 101550853 | q22.1    | T/C                       | 0.195 | 0.413           | 99.7                | 0.35            | 0.076                          | 6.52E-15              | 2.85E-10                 |
| rs10791569 | 11  | 101593545 | q22.1    | C/A                       | 0.398 | 0.501           | 99.2                | 0.22            | 0.053                          | 4.92E-09              | 2.34E-06                 |
| rs2846836  | 11  | 101610883 | q22.2    | A/G                       | 0.386 | 0.360           | 98.5                | 0.22            | 0.058                          | 2.05E-09              | 1.35E-06                 |
| rs480846   | 11  | 101850444 | q22.2    | A/G                       | 0.093 | 0.178           | 100.0               | 0.34            | 0.047                          | 1.19E-08              | 4.05E-06                 |
| rs480950   | 11  | 101850484 | q22.2    | A/C                       | 0.443 | 0.851           | 98.6                | 0.24            | 0.058                          | 2.69E-11              | 7.04E-08                 |
| rs651853   | 11  | 101871180 | q22.2    | A/G                       | 0.093 | 0.178           | 100.0               | 0.34            | 0.047                          | 1.19E-08              | 4.05E-06                 |
| rs520100   | 11  | 101882479 | q22.2    | A/G                       | 0.233 | 0.444           | 99.9                | -0.25           | 0.035                          | 1.62E-09              | 1.07E-06                 |
| rs2510488  | 11  | 101882638 | q22.2    | A/T                       | 0.232 | 0.376           | 99.6                | -0.25           | 0.036                          | 6.21E-10              | 5.72E-07                 |
| rs9651711  | 11  | 101933923 | q22.2    | A/G                       | 0.227 | 0.481           | 99.0                | 0.28            | 0.057                          | 1.36E-11              | 4.44E-08                 |
| rs1940054  | 11  | 101955161 | q22.2    | C/A                       | 0.378 | 0.988           | 100.0               | 0.26            | 0.058                          | 1.24E-12              | 9.06E-09                 |
| rs1939008  | 11  | 102161633 | q22.2    | A/G                       | 0.286 | 0.382           | 98.7                | 0.25            | 0.067                          | 3.04E-11              | 8.26E-08                 |
| rs603050   | 11  | 102185439 | q22.2    | T/C                       | 0.361 | 0.626           | 100.0               | -0.44           | 0.170                          | 1.15E-33              | 1.28E-22                 |
| rs11225434 | 11  | 102196692 | q22.2    | C/T                       | 0.384 | 0.158           | 98.5                | 0.39            | 0.135                          | 9.03E-29              | 2.07E-19                 |
| rs495366   | 11  | 102200318 | q22.2    | A/G                       | 0.361 | 0.750           | 98.6                | -0.44           | 0.175                          | 5.73E-34              | 8.39E-23                 |
| rs7926920  | 11  | 102203934 | q22.2    | A/G                       | 0.397 | 0.074           | 97.6                | 0.38            | 0.122                          | 1.03E-26              | 4.75E-18                 |
| rs650108   | 11  | 102213997 | q22.2    | A/G                       | 0.353 | 0.823           | 95.5                | -0.42           | 0.156                          | 9.44E-31              | 1.06E-20                 |
| rs610950   | 11  | 102224940 | q22.2    | C/T                       | 0.119 | 0.035           | 95.5                | -0.37           | 0.062                          | 1.08E-10              | 1.87E-07                 |
| rs613804   | 11  | 102225631 | q22.2    | A/G                       | 0.123 | 0.889           | 97.4                | -0.39           | 0.055                          | 1.91E-12              | 1.21E-08                 |
| rs11225458 | 11  | 102270618 | q22.2    | T/C                       | 0.206 | 0.779           | 98.2                | 0.38            | 0.096                          | 8.98E-19              | 8.09E-13                 |
| rs948399   | 11  | 102276350 | q22.2    | C/T                       | 0.203 | 0.858           | 99.6                | 0.38            | 0.093                          | 4.78E-19              | 5.27E-13                 |
| rs7115014  | 11  | 102310143 | q22.2    | A/G                       | 0.352 | 0.534           | 99.7                | 0.32            | 0.095                          | 3.99E-19              | 4.70E-13                 |

**Table S1** (continued)

| RS ID      | Chr | Position  | Cytoband | Minor/<br>major<br>allele | MAF   | HWE<br><i>P</i> | Call<br>Rate<br>(%) | Effect<br>Size* | Proportion.<br>of<br>Variation | <i>P</i> <sup>†</sup> | GC <i>P</i> <sup>‡</sup> |
|------------|-----|-----------|----------|---------------------------|-------|-----------------|---------------------|-----------------|--------------------------------|-----------------------|--------------------------|
| rs10502008 | 11  | 102310812 | q22.2    | T/C                       | 0.161 | 0.784           | 98.7                | 0.33            | 0.063                          | 3.63E-12              | 1.87E-08                 |
| rs3819089  | 11  | 102327943 | q22.2    | T/C                       | 0.257 | 0.404           | 100.0               | -0.30           | 0.081                          | 1.07E-13              | 2.00E-09                 |
| rs671188   | 11  | 102334665 | q22.2    | A/G                       | 0.484 | 0.359           | 97.4                | 0.20            | 0.044                          | 2.00E-08              | 5.68E-06                 |
| rs659383   | 11  | 102336301 | q22.2    | A/G                       | 0.484 | 0.263           | 100.0               | 0.20            | 0.043                          | 5.38E-09              | 2.34E-06                 |
| rs2513998  | 11  | 102488778 | q22.3    | C/G                       | 0.347 | 0.279           | 99.9                | -0.31           | 0.085                          | 1.88E-16              | 2.76E-11                 |
| rs685395   | 11  | 102572670 | q22.3    | T/C                       | 0.260 | 0.225           | 100.0               | -0.33           | 0.100                          | 3.22E-17              | 9.78E-12                 |
| rs664310   | 11  | 102590048 | q22.3    | T/C                       | 0.233 | 0.097           | 100.0               | 0.25            | 0.040                          | 3.78E-09              | 1.84E-06                 |
| rs11225649 | 11  | 102656726 | q22.3    | A/C                       | 0.205 | 0.543           | 99.9                | 0.30            | 0.054                          | 5.30E-12              | 2.37E-08                 |
| rs11225721 | 11  | 102710521 | q22.3    | C/T                       | 0.284 | 0.593           | 99.0                | -0.31           | 0.085                          | 3.20E-16              | 3.96E-11                 |
| rs10895399 | 11  | 102715325 | q22.3    | A/G                       | 0.283 | 0.294           | 99.6                | -0.30           | 0.080                          | 3.91E-15              | 2.08E-10                 |
| rs10895400 | 11  | 102715424 | q22.3    | T/C                       | 0.283 | 0.628           | 99.0                | -0.31           | 0.081                          | 1.33E-15              | 1.01E-10                 |
| rs7118092  | 11  | 102720958 | q22.3    | T/C                       | 0.288 | 0.366           | 99.2                | -0.31           | 0.086                          | 4.78E-16              | 5.21E-11                 |
| rs7941666  | 11  | 102726747 | q22.3    | A/G                       | 0.230 | 0.289           | 100.0               | -0.33           | 0.086                          | 4.07E-15              | 2.27E-10                 |
| rs3910095  | 11  | 102754839 | q22.3    | G/A                       | 0.236 | 0.188           | 98.1                | -0.33           | 0.088                          | 3.65E-15              | 2.16E-10                 |
| rs11225755 | 11  | 102755298 | q22.3    | G/A                       | 0.228 | 0.427           | 97.2                | -0.30           | 0.074                          | 9.17E-14              | 1.67E-09                 |
| rs7129349  | 11  | 102787153 | q22.3    | A/G                       | 0.230 | 0.289           | 100.0               | -0.33           | 0.086                          | 4.07E-15              | 2.27E-10                 |
| rs11225822 | 11  | 102850240 | q22.3    | C/A                       | 0.249 | 0.166           | 100.0               | -0.33           | 0.084                          | 2.55E-15              | 1.60E-10                 |
| rs4754974  | 11  | 103015011 | q22.3    | A/C                       | 0.204 | 0.315           | 100.0               | 0.28            | 0.065                          | 3.96E-10              | 4.78E-07                 |
| rs10791634 | 11  | 103029222 | q22.3    | G/A                       | 0.204 | 0.315           | 100.0               | 0.28            | 0.065                          | 3.96E-10              | 4.78E-07                 |
| rs11225952 | 11  | 103029324 | q22.3    | T/G                       | 0.204 | 0.315           | 100.0               | 0.28            | 0.065                          | 3.96E-10              | 4.78E-07                 |
| rs2060752  | 11  | 103032699 | q22.3    | T/C                       | 0.221 | 0.250           | 98.7                | 0.26            | 0.056                          | 1.33E-09              | 9.87E-07                 |
| rs10488753 | 11  | 103035917 | q22.3    | T/C                       | 0.221 | 0.426           | 99.5                | 0.25            | 0.053                          | 6.73E-09              | 2.91E-06                 |

**Table S1** (continued)

| RS ID      | Chr | Position  | Cytoband | Minor/<br>major<br>allele | MAF   | HWE<br><i>P</i> | Call<br>Rate<br>(%) | Effect<br>Size* | Proportion.<br>of<br>Variation | <i>P</i> <sup>†</sup> | GC <i>P</i> <sup>‡</sup> |
|------------|-----|-----------|----------|---------------------------|-------|-----------------|---------------------|-----------------|--------------------------------|-----------------------|--------------------------|
| rs7120812  | 11  | 103036338 | q22.3    | T/C                       | 0.201 | 0.097           | 99.5                | 0.28            | 0.065                          | 3.02E-10              | 4.00E-07                 |
| rs10488749 | 11  | 103045991 | q22.3    | G/C                       | 0.221 | 0.397           | 100.0               | 0.25            | 0.054                          | 6.64E-09              | 2.90E-06                 |
| rs10791643 | 11  | 103179549 | q22.3    | A/G                       | 0.221 | 0.124           | 95.2                | 0.28            | 0.064                          | 9.32E-11              | 1.74E-07                 |
| rs10502019 | 11  | 103218742 | q22.3    | C/T                       | 0.106 | 0.357           | 97.8                | -0.31           | 0.039                          | 8.23E-08              | 1.44E-05                 |
| rs1052313  | 11  | 103413945 | q22.3    | A/G                       | 0.395 | 0.326           | 100.0               | -0.20           | 0.028                          | 3.35E-08              | 8.03E-06                 |
| rs2515081  | 11  | 103473686 | q22.3    | T/A                       | 0.138 | 0.612           | 98.6                | -0.36           | 0.077                          | 8.48E-12              | 4.04E-08                 |
| rs168636   | 11  | 103487043 | q22.3    | G/A                       | 0.237 | 0.249           | 100.0               | 0.26            | 0.047                          | 2.99E-10              | 3.42E-07                 |
| rs668285   | 11  | 103508755 | q22.3    | T/C                       | 0.239 | 0.194           | 99.7                | 0.23            | 0.048                          | 8.76E-09              | 3.31E-06                 |
| rs12226700 | 11  | 103518473 | q22.3    | T/A                       | 0.350 | 0.022           | 100.0               | -0.23           | 0.062                          | 8.32E-11              | 1.57E-07                 |
| rs12274835 | 11  | 103518670 | q22.3    | A/G                       | 0.350 | 0.022           | 100.0               | -0.23           | 0.062                          | 8.32E-11              | 1.57E-07                 |
| rs10895597 | 11  | 103542270 | q22.3    | A/G                       | 0.396 | 0.293           | 97.8                | -0.28           | 0.097                          | 8.73E-16              | 9.21E-11                 |
| rs11226367 | 11  | 103826844 | q22.3    | C/T                       | 0.153 | 0.393           | 99.4                | 0.43            | 0.112                          | 5.02E-18              | 3.44E-12                 |
| rs11226373 | 11  | 103839449 | q22.3    | G/A                       | 0.152 | 0.423           | 99.6                | 0.44            | 0.116                          | 1.38E-18              | 1.50E-12                 |
| rs1487694  | 11  | 103861379 | q22.3    | A/G                       | 0.130 | 0.469           | 100.0               | 0.41            | 0.086                          | 9.05E-15              | 3.92E-10                 |
| rs2046652  | 11  | 103865864 | q22.3    | G/A                       | 0.130 | 0.490           | 99.9                | 0.41            | 0.085                          | 1.11E-14              | 4.43E-10                 |
| rs7114728  | 11  | 103874971 | q22.3    | G/T                       | 0.135 | 0.773           | 97.9                | 0.41            | 0.085                          | 4.67E-15              | 2.46E-10                 |
| rs4558140  | 11  | 103877366 | q22.3    | A/T                       | 0.130 | 0.469           | 100.0               | 0.41            | 0.086                          | 9.05E-15              | 3.92E-10                 |
| rs2408942  | 11  | 103888924 | q22.3    | G/C                       | 0.133 | 0.619           | 98.6                | 0.40            | 0.083                          | 1.72E-14              | 5.87E-10                 |
| rs7930608  | 11  | 103889136 | q22.3    | A/T                       | 0.130 | 0.469           | 100.0               | 0.41            | 0.086                          | 9.05E-15              | 3.92E-10                 |
| rs11226402 | 11  | 103890581 | q22.3    | A/G                       | 0.130 | 0.469           | 100.0               | 0.41            | 0.086                          | 9.05E-15              | 3.92E-10                 |
| rs11226403 | 11  | 103890838 | q22.3    | A/G                       | 0.130 | 0.469           | 100.0               | 0.41            | 0.086                          | 9.05E-15              | 3.92E-10                 |
| rs1565130  | 11  | 103893230 | q22.3    | T/G                       | 0.130 | 0.469           | 100.0               | 0.41            | 0.086                          | 9.05E-15              | 3.92E-10                 |

**Table S1** (continued)

| RS ID      | Chr | Position  | Cytoband | Minor/<br>major<br>allele | MAF   | HWE<br><i>P</i> | Call<br>Rate<br>(%) | Effect<br>Size* | Proportion.<br>of<br>Variation | <i>P</i> <sup>†</sup> | GC <i>P</i> <sup>‡</sup> |
|------------|-----|-----------|----------|---------------------------|-------|-----------------|---------------------|-----------------|--------------------------------|-----------------------|--------------------------|
| rs1565131  | 11  | 103893472 | q22.3    | A/G                       | 0.130 | 0.469           | 100.0               | 0.41            | 0.086                          | 9.05E-15              | 3.92E-10                 |
| rs1565132  | 11  | 103893539 | q22.3    | A/G                       | 0.130 | 0.469           | 100.0               | 0.41            | 0.086                          | 9.05E-15              | 3.92E-10                 |
| rs1487683  | 11  | 103893924 | q22.3    | T/G                       | 0.130 | 0.469           | 100.0               | 0.41            | 0.086                          | 9.05E-15              | 3.92E-10                 |
| rs11226407 | 11  | 103893969 | q22.3    | A/T                       | 0.129 | 0.528           | 99.4                | 0.41            | 0.083                          | 1.87E-14              | 6.23E-10                 |
| rs10502035 | 11  | 103908419 | q22.3    | G/A                       | 0.132 | 0.451           | 98.3                | 0.41            | 0.087                          | 6.84E-15              | 3.28E-10                 |
| rs2220349  | 11  | 103917498 | q22.3    | A/G                       | 0.116 | 0.123           | 96.7                | 0.39            | 0.081                          | 5.52E-12              | 3.20E-08                 |
| rs17102636 | 11  | 103922584 | q22.3    | T/C                       | 0.131 | 0.658           | 99.9                | 0.41            | 0.085                          | 8.64E-15              | 3.74E-10                 |
| rs1942518  | 11  | 104045499 | q22.3    | C/A                       | 0.371 | 0.998           | 100.0               | 0.35            | 0.128                          | 4.03E-21              | 3.16E-14                 |
| rs1942517  | 11  | 104047073 | q22.3    | A/G                       | 0.400 | 0.967           | 100.0               | -0.29           | 0.070                          | 1.96E-15              | 1.28E-10                 |
| rs1893462  | 11  | 104064008 | q22.3    | A/G                       | 0.399 | 0.885           | 99.5                | -0.29           | 0.068                          | 2.08E-15              | 1.34E-10                 |
| rs6591093  | 11  | 104068778 | q22.3    | T/A                       | 0.400 | 0.967           | 100.0               | -0.29           | 0.070                          | 1.96E-15              | 1.28E-10                 |
| rs883505   | 11  | 104069736 | q22.3    | T/A                       | 0.371 | 0.957           | 100.0               | 0.35            | 0.126                          | 1.49E-20              | 7.77E-14                 |
| rs17102902 | 11  | 104078814 | q22.3    | C/T                       | 0.078 | 0.877           | 98.7                | -0.35           | 0.032                          | 9.05E-08              | 1.52E-05                 |
| rs2155161  | 11  | 104079038 | q22.3    | C/T                       | 0.400 | 0.881           | 99.6                | -0.28           | 0.068                          | 4.29E-15              | 2.15E-10                 |
| rs7122441  | 11  | 104103584 | q22.3    | T/A                       | 0.413 | 0.073           | 100.0               | -0.26           | 0.066                          | 4.26E-14              | 9.75E-10                 |
| rs1147027  | 11  | 104109472 | q22.3    | C/A                       | 0.402 | 0.694           | 99.5                | -0.29           | 0.069                          | 2.23E-15              | 1.40E-10                 |
| rs1147049  | 11  | 104164746 | q22.3    | C/T                       | 0.397 | 0.962           | 99.2                | 0.29            | 0.100                          | 2.01E-15              | 1.82E-10                 |
| rs1529337  | 11  | 104186900 | q22.3    | G/A                       | 0.445 | 0.650           | 100.0               | 0.22            | 0.061                          | 2.06E-09              | 1.42E-06                 |
| rs6591099  | 11  | 104196203 | q22.3    | G/A                       | 0.464 | 0.224           | 95.2                | 0.21            | 0.057                          | 2.84E-08              | 8.30E-06                 |
| rs1030395  | 11  | 104201267 | q22.3    | C/T                       | 0.445 | 0.650           | 100.0               | 0.22            | 0.061                          | 2.06E-09              | 1.42E-06                 |
| rs10736643 | 11  | 104201414 | q22.3    | A/T                       | 0.445 | 0.650           | 100.0               | 0.22            | 0.061                          | 2.06E-09              | 1.42E-06                 |
| rs1559839  | 11  | 104201936 | q22.3    | G/A                       | 0.445 | 0.677           | 99.6                | 0.22            | 0.062                          | 1.04E-09              | 9.00E-07                 |



**Table S1** (continued)

| RS ID      | Chr | Position  | Cytoband | Minor/<br>major<br>allele | MAF   | HWE<br><i>P</i> | Call<br>Rate<br>(%) | Effect<br>Size* | Proportion.<br>of<br>Variation | <i>P</i> <sup>†</sup> | GC <i>P</i> <sup>‡</sup> |
|------------|-----|-----------|----------|---------------------------|-------|-----------------|---------------------|-----------------|--------------------------------|-----------------------|--------------------------|
| rs573894   | 11  | 104276696 | q22.3    | A/G                       | 0.346 | 0.001           | 99.9                | -0.23           | 0.079                          | 3.78E-10              | 6.55E-07                 |
| rs488928   | 11  | 104294431 | q22.3    | G/A                       | 0.478 | 0.334           | 97.4                | 0.19            | 0.063                          | 5.43E-08              | 1.51E-05                 |
| rs3181174  | 11  | 104381934 | q22.3    | A/T                       | 0.162 | 0.735           | 99.9                | -0.29           | 0.049                          | 1.38E-09              | 9.55E-07                 |
| rs2510177  | 11  | 104946270 | q22.3    | A/G                       | 0.130 | 0.038           | 100.0               | 0.27            | 0.030                          | 8.65E-08              | 1.48E-05                 |
| rs11226791 | 11  | 104965252 | q22.3    | C/T                       | 0.084 | 0.833           | 99.7                | 0.34            | 0.042                          | 3.31E-08              | 7.89E-06                 |
| rs10502062 | 11  | 105126467 | q22.3    | G/T                       | 0.435 | 0.288           | 100.0               | 0.20            | 0.045                          | 1.83E-08              | 5.35E-06                 |
| rs10502063 | 11  | 105126491 | q22.3    | C/T                       | 0.435 | 0.256           | 99.0                | 0.20            | 0.044                          | 2.06E-08              | 5.79E-06                 |
| rs10895950 | 11  | 105770571 | q22.3    | G/A                       | 0.265 | 0.147           | 100.0               | 0.21            | 0.042                          | 8.04E-08              | 1.44E-05                 |
| rs10895951 | 11  | 105770740 | q22.3    | G/A                       | 0.266 | 0.143           | 99.9                | 0.21            | 0.042                          | 9.57E-08              | 1.62E-05                 |
| rs11227059 | 11  | 105842332 | q22.3    | T/G                       | 0.281 | 0.066           | 99.0                | 0.23            | 0.056                          | 2.34E-09              | 1.45E-06                 |
| rs10502070 | 11  | 105844419 | q22.3    | A/G                       | 0.282 | 0.022           | 100.0               | 0.24            | 0.061                          | 4.00E-10              | 4.52E-07                 |
| rs10502072 | 11  | 105855084 | q22.3    | C/T                       | 0.243 | 0.027           | 99.4                | 0.24            | 0.050                          | 2.70E-09              | 1.51E-06                 |
| rs12290638 | 11  | 105869193 | q22.3    | G/T                       | 0.269 | 0.011           | 95.9                | 0.21            | 0.049                          | 7.14E-08              | 1.41E-05                 |
| rs12805072 | 11  | 105874003 | q22.3    | T/C                       | 0.267 | 0.059           | 98.3                | 0.26            | 0.068                          | 2.94E-11              | 8.20E-08                 |
| rs12274945 | 11  | 105880509 | q22.3    | C/A                       | 0.431 | 0.220           | 98.7                | 0.19            | 0.044                          | 3.02E-08              | 7.50E-06                 |
| rs879929   | 11  | 106159569 | q22.3    | A/T                       | 0.128 | 0.052           | 99.6                | -0.36           | 0.063                          | 1.88E-10              | 2.78E-07                 |
| rs7125424  | 11  | 106284519 | q22.3    | T/G                       | 0.134 | 0.527           | 99.9                | -0.35           | 0.068                          | 1.31E-11              | 4.68E-08                 |
| rs10502081 | 11  | 106376316 | q22.3    | G/T                       | 0.135 | 0.506           | 97.7                | -0.35           | 0.065                          | 2.09E-11              | 6.29E-08                 |
| rs11212024 | 11  | 106452810 | q22.3    | A/G                       | 0.129 | 0.984           | 99.4                | -0.34           | 0.057                          | 2.00E-10              | 2.72E-07                 |
| rs17106456 | 11  | 106504670 | q22.3    | C/A                       | 0.136 | 0.953           | 95.9                | -0.30           | 0.049                          | 7.99E-09              | 3.14E-06                 |
| rs10890667 | 11  | 106619432 | q22.3    | C/T                       | 0.075 | 0.179           | 99.4                | 0.38            | 0.043                          | 3.78E-08              | 8.69E-06                 |
| rs7946787  | 11  | 106645757 | q22.3    | C/A                       | 0.359 | 0.634           | 100.0               | -0.21           | 0.047                          | 4.19E-08              | 9.57E-06                 |
| rs661889   | 11  | 106762599 | q22.3    | T/C                       | 0.365 | 0.973           | 98.6                | -0.20           | 0.045                          | 9.20E-08              | 1.61E-05                 |
| rs502318   | 11  | 106922204 | q22.3    | C/T                       | 0.305 | 0.158           | 99.9                | -0.23           | 0.046                          | 6.66E-09              | 2.72E-06                 |
| rs1531751  | 11  | 107024176 | q22.3    | C/G                       | 0.246 | 0.067           | 98.3                | -0.24           | 0.054                          | 6.09E-10              | 5.65E-07                 |

Abbreviations: Chr, chromosome; MAF, minor allele frequency; HWE, Hardy-Weinberg equilibrium

\* Change in  $\ln$ -MMP1 per copy of minor allele

†  $P$ -value from primary association analysis

‡ Genomic control-corrected  $P$ -value

**Table S2.** Associations between MMP-1 levels, MMP-1 associated SNPs and baseline characteristics\*

| Baseline characteristics             | Correlation coefficients     |                 | Change in trait by SNP genotype |                         |                         |                                      |
|--------------------------------------|------------------------------|-----------------|---------------------------------|-------------------------|-------------------------|--------------------------------------|
|                                      | with <i>ln</i> -MMP-1 levels |                 | $(\beta \pm \text{S.E.})$       |                         |                         |                                      |
|                                      | <i>r</i>                     | <i>P</i> -value | rs495366 <sup>†</sup>           | rs12289128 <sup>†</sup> | rs11226373 <sup>†</sup> | rs12289128-<br>rs495366 <sup>‡</sup> |
| Body mass index (kg/m <sup>2</sup> ) | 0.04                         | 0.50            | -0.11 ± 0.23                    | 0.30 ± 0.30             | -0.08 ± 0.31            | -0.01 ± 0.23                         |
| Fasting triglyceride (mg/dL)         | 0.14                         | 0.0006          | 0.01 ± 2.14                     | 2.54 ± 2.80             | 1.79 ± 2.88             | -0.64 ± 2.11                         |
| Fasting total cholesterol (mg/dL)    | 0                            | 0.73            | 1.54 ± 2.41                     | -2.74 ± 3.14            | 2.57 ± 3.23             | -0.02 ± 2.42                         |
| HDL/LDL cholesterol ratio            | -0.06                        | 0.05            | -0.004 ± 0.01                   | -0.01 ± 0.02            | -0.002 ± 0.02           | 0.01 ± 0.01                          |
| Systolic blood pressure              | 0.06                         | 0.09            | -0.58 ± 0.70                    | 1.23 ± 0.91             | -0.39 ± 0.94            | -0.21 ± 0.68                         |
| Diastolic blood pressure             | 0.01                         | 0.83            | 0.51 ± 0.44                     | 0.62 ± 0.58             | -0.22 ± 0.61            | -0.87 ± 0.45                         |
| Pulse Pressure                       | 0.08                         | 0.04            | -1.05 ± 0.53 <sup>§</sup>       | 0.66 ± 0.69             | -0.22 ± 0.71            | 0.61 ± 0.52                          |

\* Adjusted for age, age<sup>2</sup>, sex, age-by-sex and age<sup>2</sup>-by-sex interactions.

<sup>†</sup> Change in trait per copy of minor allele.

<sup>‡</sup> Change in trait per copy of G<sub>rs12289128</sub>-C<sub>rs495366</sub> haplotype

§  $P < 0.05$

**Table S3.** SNPs in *MMP-1* promoter region reported previously in Caucasians\*

| <b>SNP</b> | <b>Location</b> | <b>MAF<sup>†</sup></b> | <b>Function</b>   | <b>Traits studied</b>                                       | <b>Ref</b>        |
|------------|-----------------|------------------------|-------------------|-------------------------------------------------------------|-------------------|
| rs494379   | 102174420       | N.A.                   | Unknown           | No associations with CAD found                              | <sup>1</sup>      |
| rs514921   | 102174440       | 0.333                  | Promoter activity | MMP-1 expression in<br>atherosclerotic plaques;<br>CAD      | <sup>1, 2</sup>   |
| rs475007   | 102174522       | 0.458                  | Unknown           | No associations with CAD found                              | <sup>1</sup>      |
| rs1144393  | 102174619       | 0.353                  | Promoter activity | MMP-1 expression in<br>atherosclerotic plaques;<br>CAD, BMI | <sup>1-3</sup>    |
| rs498186   | 102174855       | 0.475                  | Unknown           | No associations with CAD found                              | <sup>1</sup>      |
| rs1799750  | 102175706       | N.A.                   | Promoter activity | CAD; internal carotid artery                                | <sup>1, 3-9</sup> |

---

stenosis; BMI; left ventricular

remodeling

---

Abbreviations: N.A. Not available in Hapmap; CAD, coronary artery disease; BMI, body mass index.

\* Data source: SeattleSNPs Program for Genomic Applications Genome Variation Server (<http://gvs.gs.washington.edu/GVS/>); populations included are HapMap-CEU, EGP-CEU, Perlegen European panel and Affy Caucasian populations; rs1799750, which was not genotyped in above-mentioned populations but has been cited from previous literature, is also included in the table.

† Based on Hapmap CEU population

Figure S1.

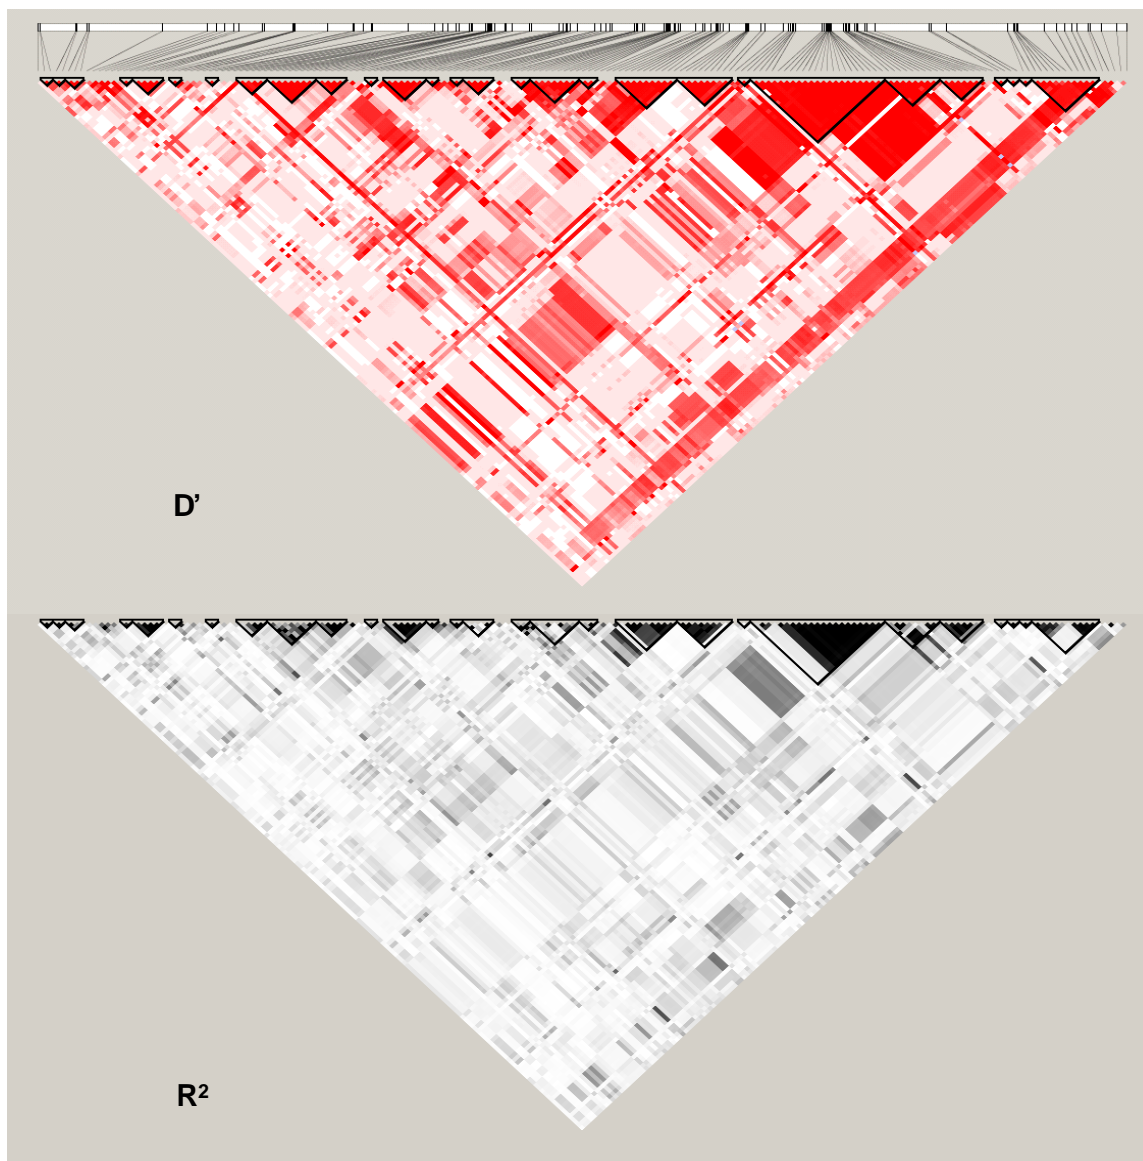

Figure S2.

A

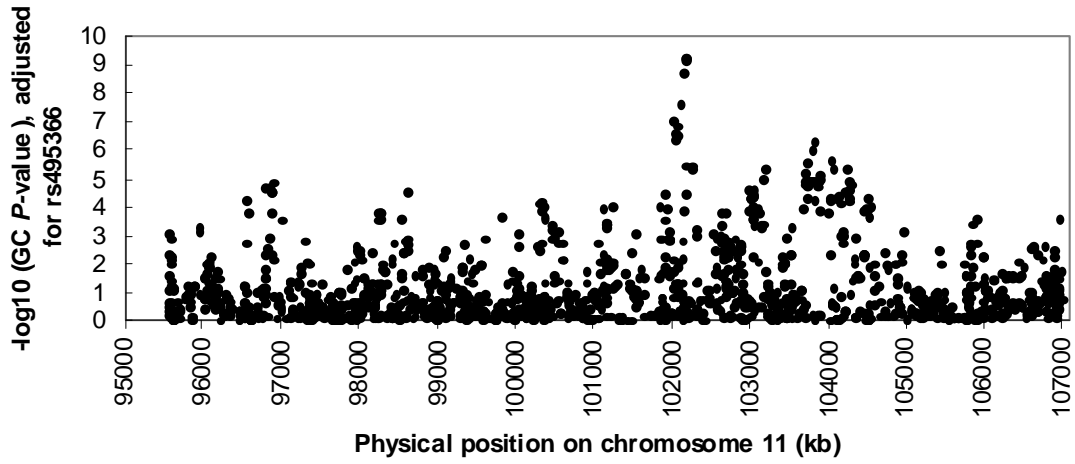

B

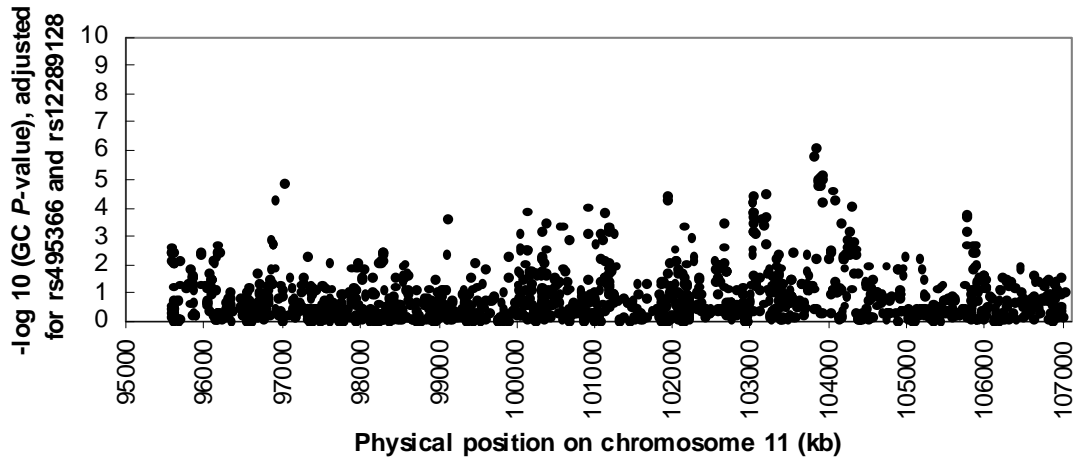

C

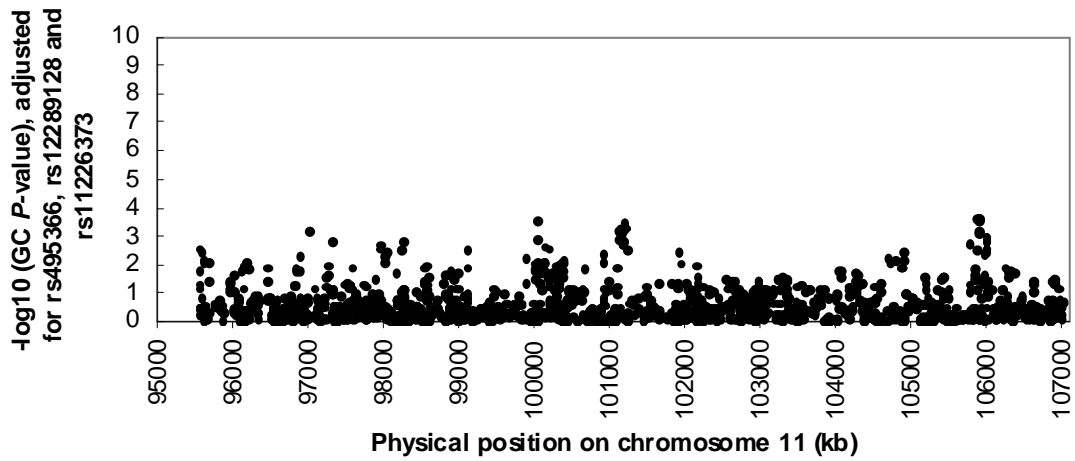



## References

1. Pearce E, Tregouet DA, Samnegard A, Morgan AR, Cox C, Hamsten A, Eriksson P, Ye S. Haplotype effect of the matrix metalloproteinase-1 gene on risk of myocardial infarction. *Circ Res.* 2005; 97:1070-1076.
2. Han Y, Wu Z, Zhang X, Yan C, Xi S, Yang Y, Pei F, Kang J. Impact of matrix metalloproteinase-1 gene variations on risk of acute coronary syndrome. *Coron Artery Dis.* 2008; 19:227-230.
3. Nho YK, Ha E, Yu KI, Chung JH, Wook NC, Chung IS, Lee MY, Shin DH. Matrix metalloproteinase-1 promoter is associated with body mass index in Korean population with aged greater or equal to 50 years. *Clin Chim Acta.* 2008; 396:14-17.
4. Rutter JL, Mitchell TI, Buttice G, Meyers J, Gusella JF, Ozelius LJ, Brinckerhoff CE. A single nucleotide polymorphism in the matrix metalloproteinase-1 promoter creates an Ets binding site and augments transcription. *Cancer Res.* 1998; 58:5321-5325.
5. Ye S, Gale CR, Martyn CN. Variation in the matrix metalloproteinase-1 gene and risk of coronary heart disease. *Eur Heart J.* 2003; 24:1668-1671.
6. Nojiri T, Morita H, Imai Y, Maemura K, Ohno M, Ogasawara K, Aizawa T, Saito A, Hayashi D, Hirata Y, Sugiyama T, Yamazaki T, Nagai R. Genetic variations of matrix metalloproteinase-1 and -3 promoter regions and their associations with susceptibility to myocardial infarction in Japanese. *International Journal of Cardiology.* 2003; 92:181-186.

7. Ghilardi G, Biondi ML, DeMonti M, Turri O, Guagnellini E, Scorza R. Matrix metalloproteinase-1 and matrix metalloproteinase-3 gene promoter polymorphisms are associated with carotid artery stenosis. *Stroke*. 2002; 33:2408-2412.
8. Horne BD, Camp NJ, Carlquist JF, Muhlestein JB, Kolek MJ, Nicholas ZP, Anderson JL. Multiple-polymorphism associations of 7 matrix metalloproteinase and tissue inhibitor metalloproteinase genes with myocardial infarction and angiographic coronary artery disease. *Am Heart J*. 2007; 154:751-758.
9. Martin TN, Penney DE, Smith JA, Groenning BA, Dargie HJ, Hillis GS. Matrix metalloproteinase-1 promoter polymorphisms and changes in left ventricular volume following acute myocardial infarction. *Am J Cardiol*. 2004; 94:1044-1046.
